# Supplementary material for: Synthesis and characterization of π-conjugated copolymers based on alkyltriazolyl substituted benzodithiophene
Source: Royal Society of Chemistry journal article supplement (doi:10.1039/c5nj03174e), 2016-01-01
Supplement: c5nj03174e1.pdf [file c5nj03174e1.pdf]

Supplementary Information for New Journal of Chemistry

**Synthesis and Characterization of  $\pi$ -Conjugated Copolymers Based on Alkyltriazolyl Substituted Benzodithiophene**

Ruihao Xie, Zhiming Chen, Wenkai Zhong, Guichuan Zhang, Yunping Huang, Lei Ying, Fei Huang\*, Yong Cao

Institute of Polymer Optoelectronic Material and Devices, State Key Laboratory of Luminescent Material and Devices, South China University of Technology, Guangzhou 510640, P.R. China

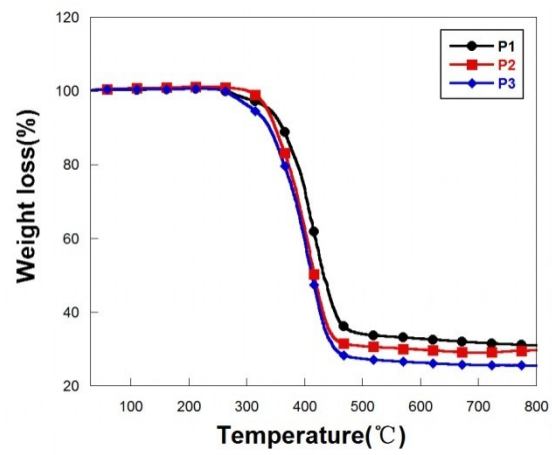

**Fig. S1.** TGA traces of copolymers P1-P3

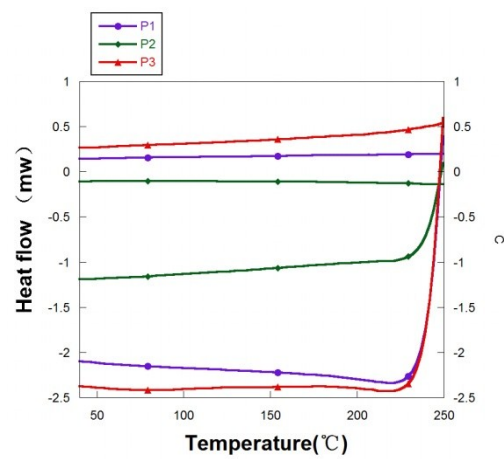

**Fig. S2.** DSC traces of copolymers P1-P3

### <sup>1</sup>H NMR spectra and <sup>13</sup>C NMR of new monomers and copolymers

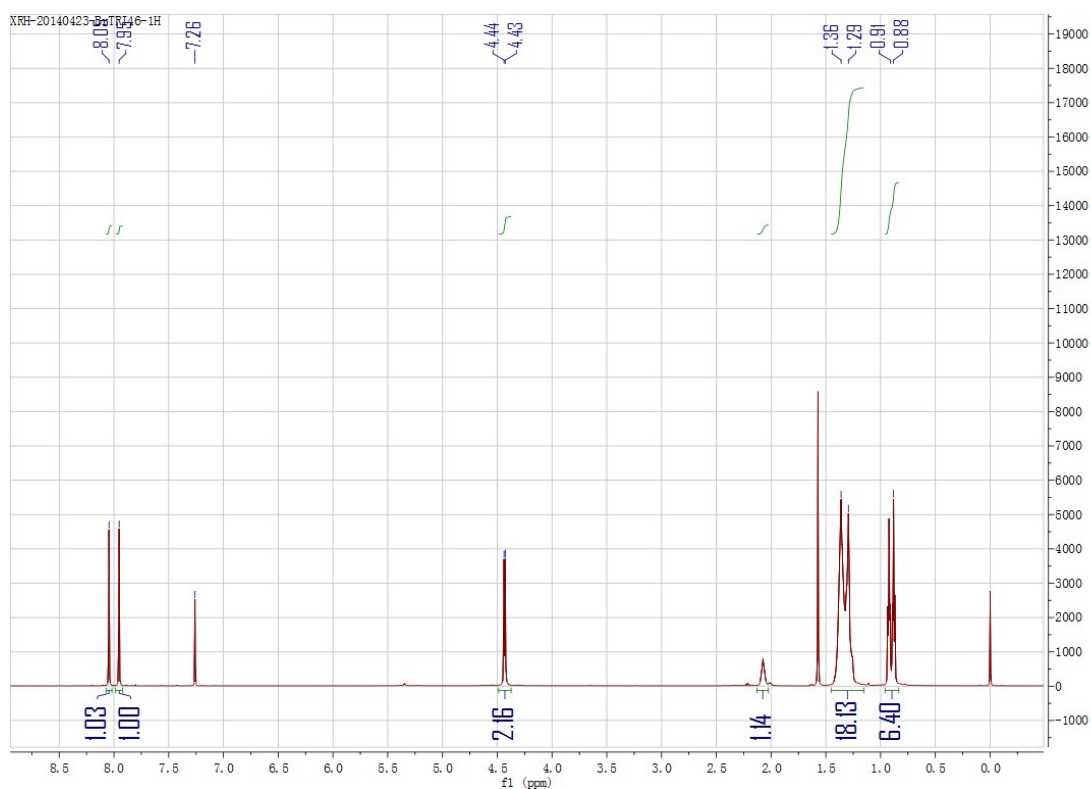

Fig. S3. <sup>1</sup>H NMR spectra of M4a

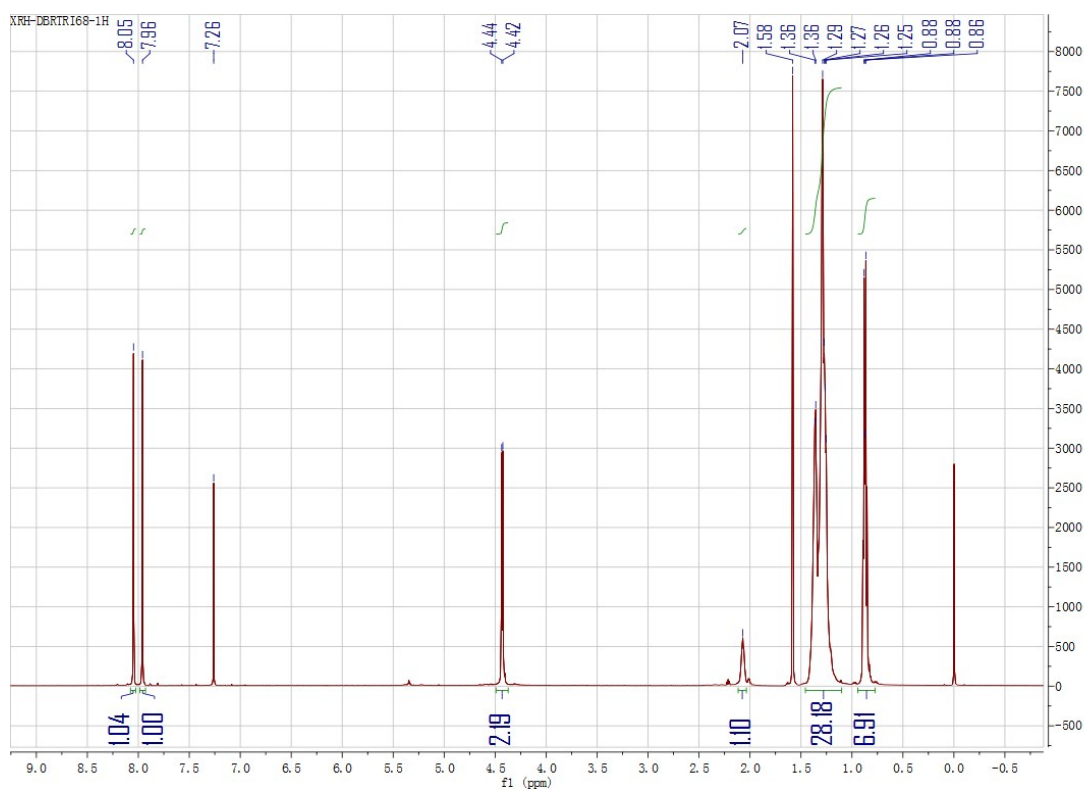

Fig. S4. <sup>1</sup>H NMR spectra of M4b

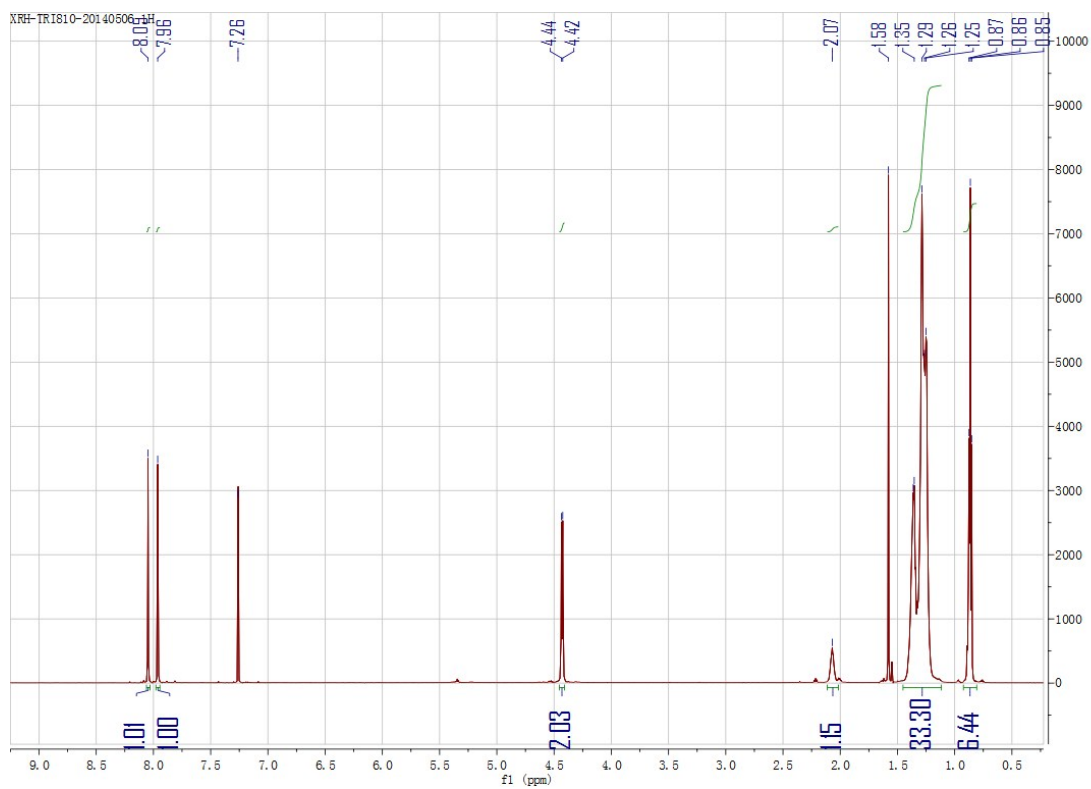

Fig. S5.  $^1\text{H}$  NMR spectra of M4c

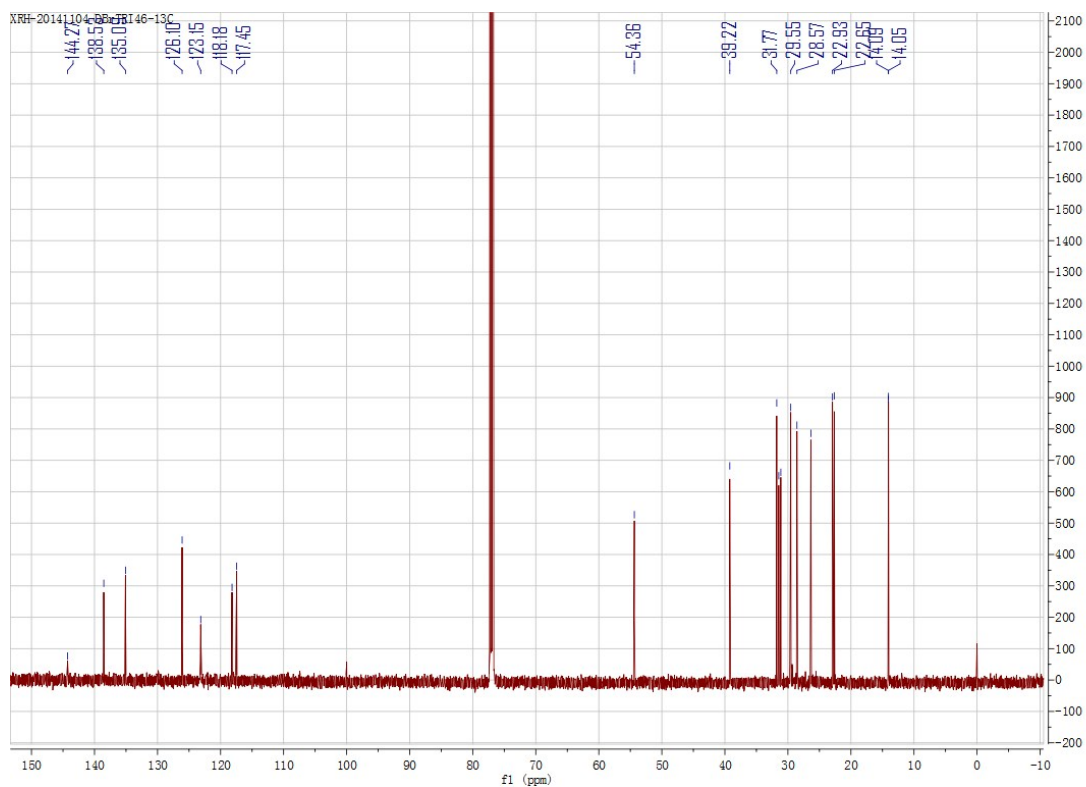

Fig. S6.  $^{13}\text{C}$  NMR spectra of M4a

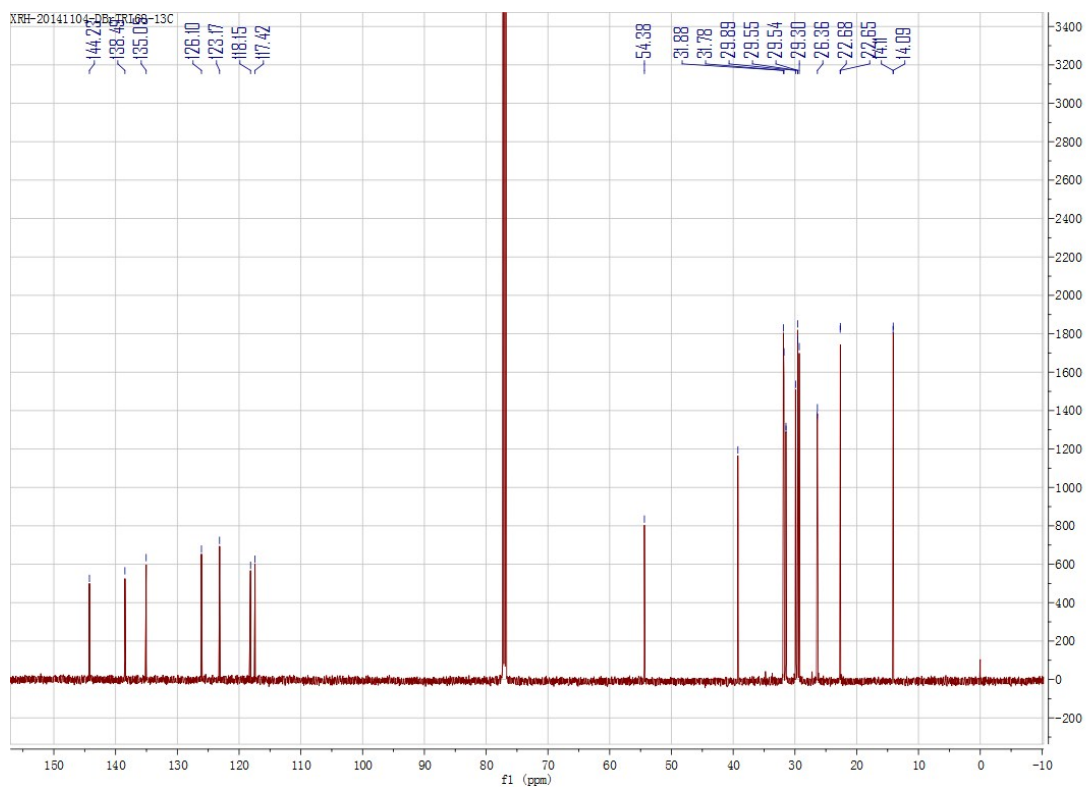

Fig. S7. <sup>13</sup>C NMR spectra of M4b

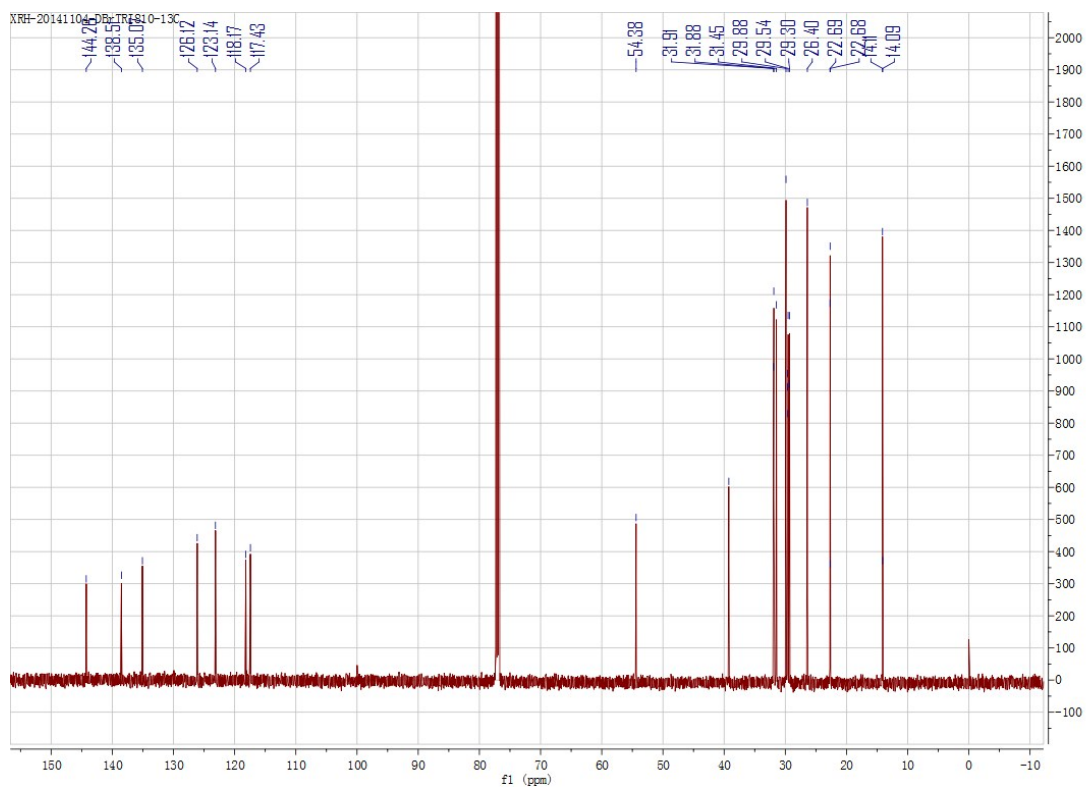

Fig. S8. <sup>13</sup>C NMR spectra of M4c

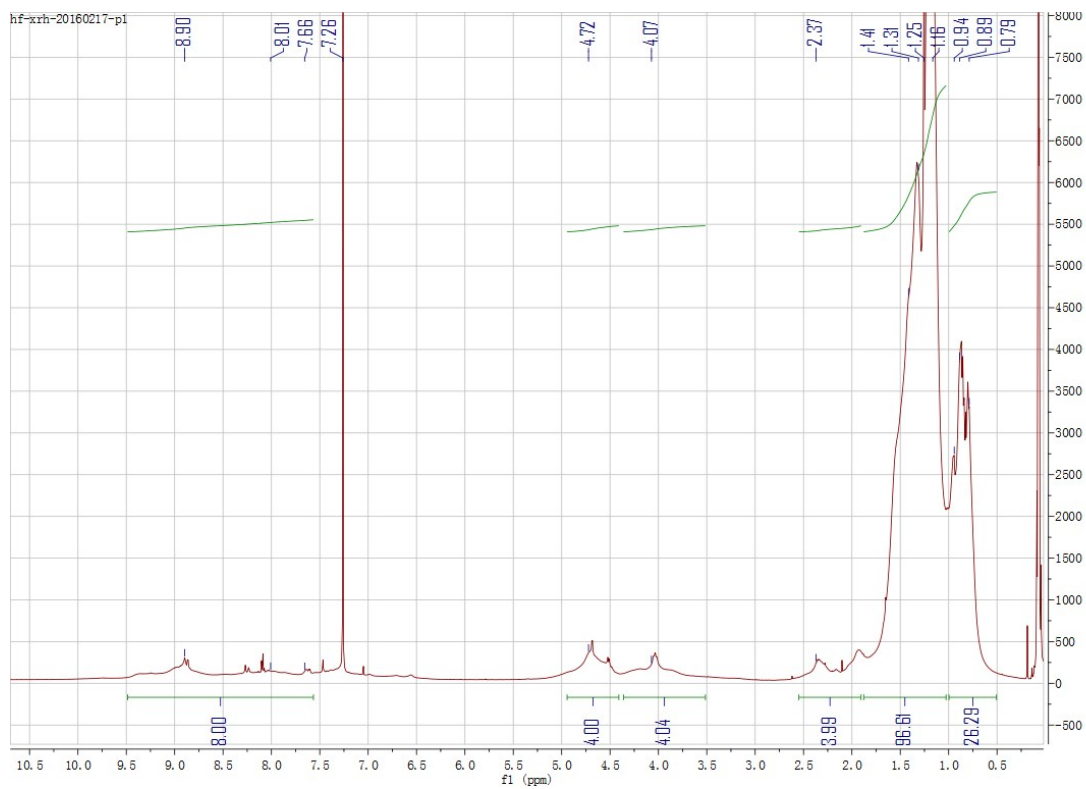

**Fig. S9.**  $^1\text{H}$  NMR spectra of P1

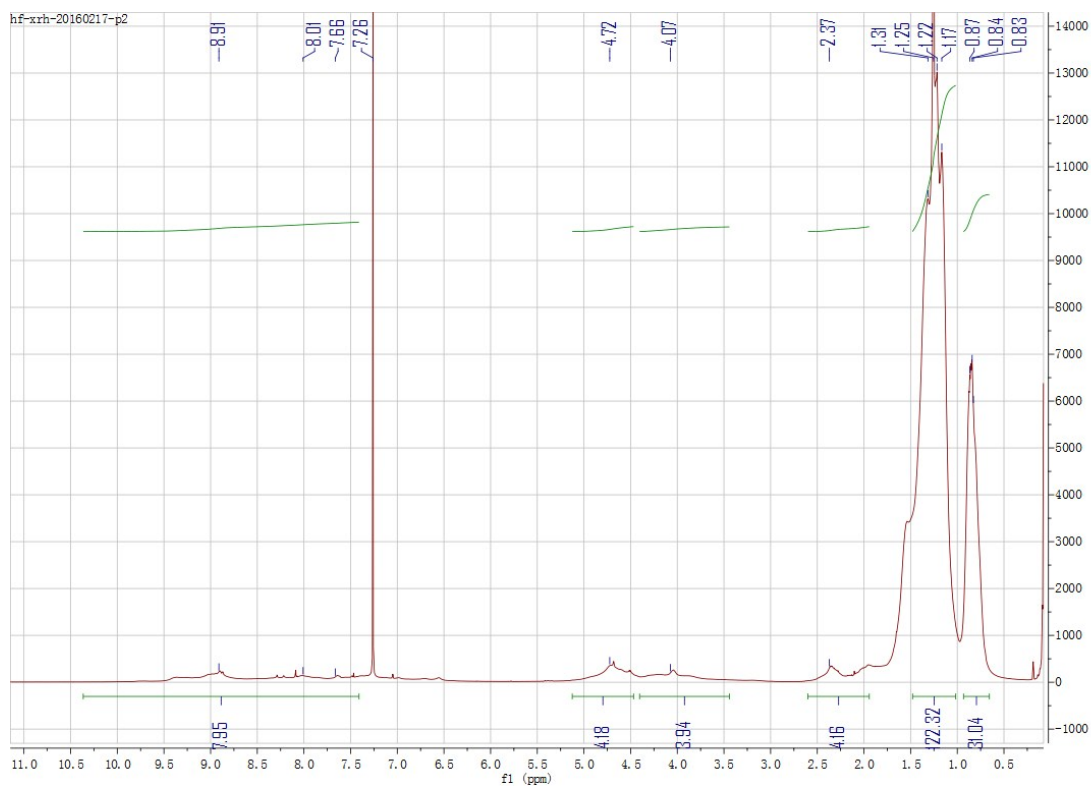

**Fig. S10.**  $^1\text{H}$  NMR spectra of P2

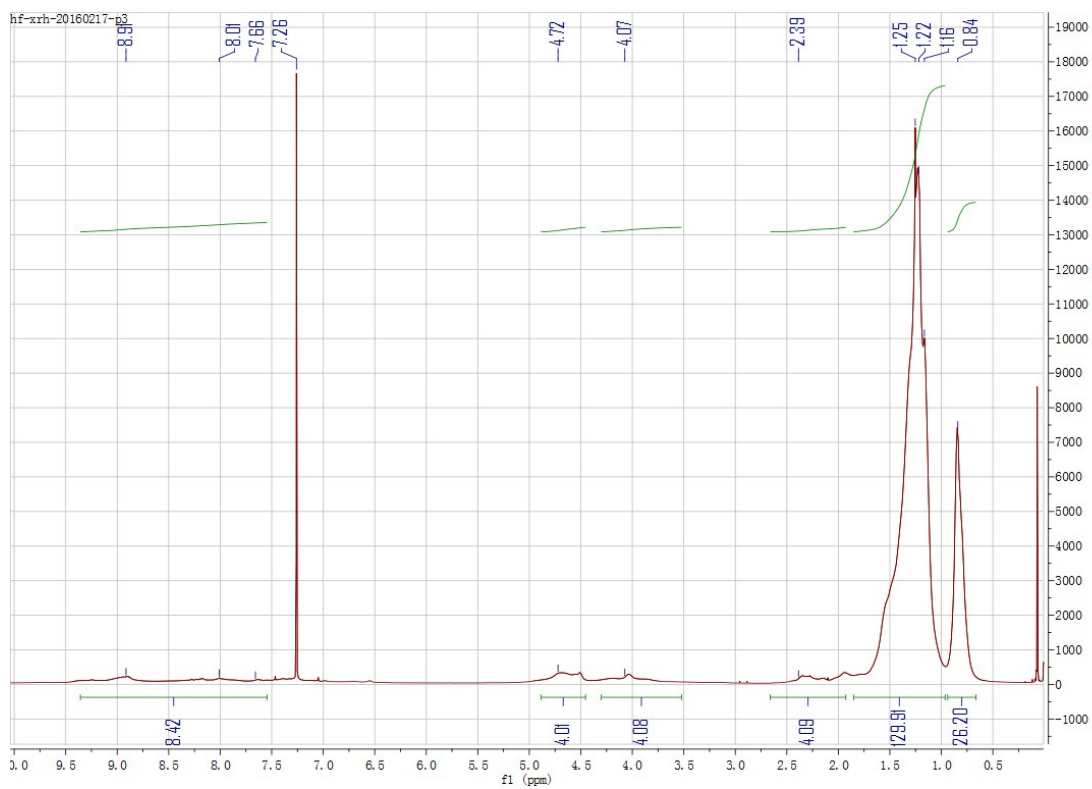

Fig. S11. <sup>1</sup>H NMR spectra of P3

### MS spectra of the new monomers

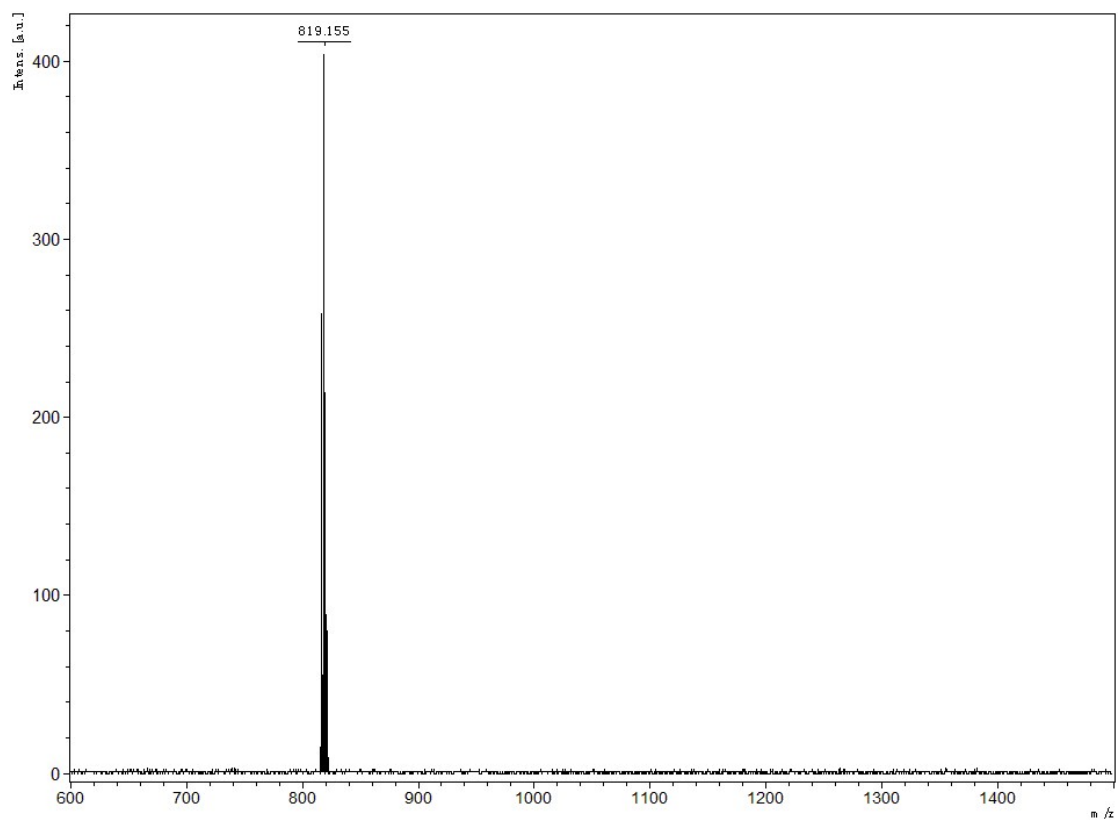

Fig. S12. MS spectra of M4a

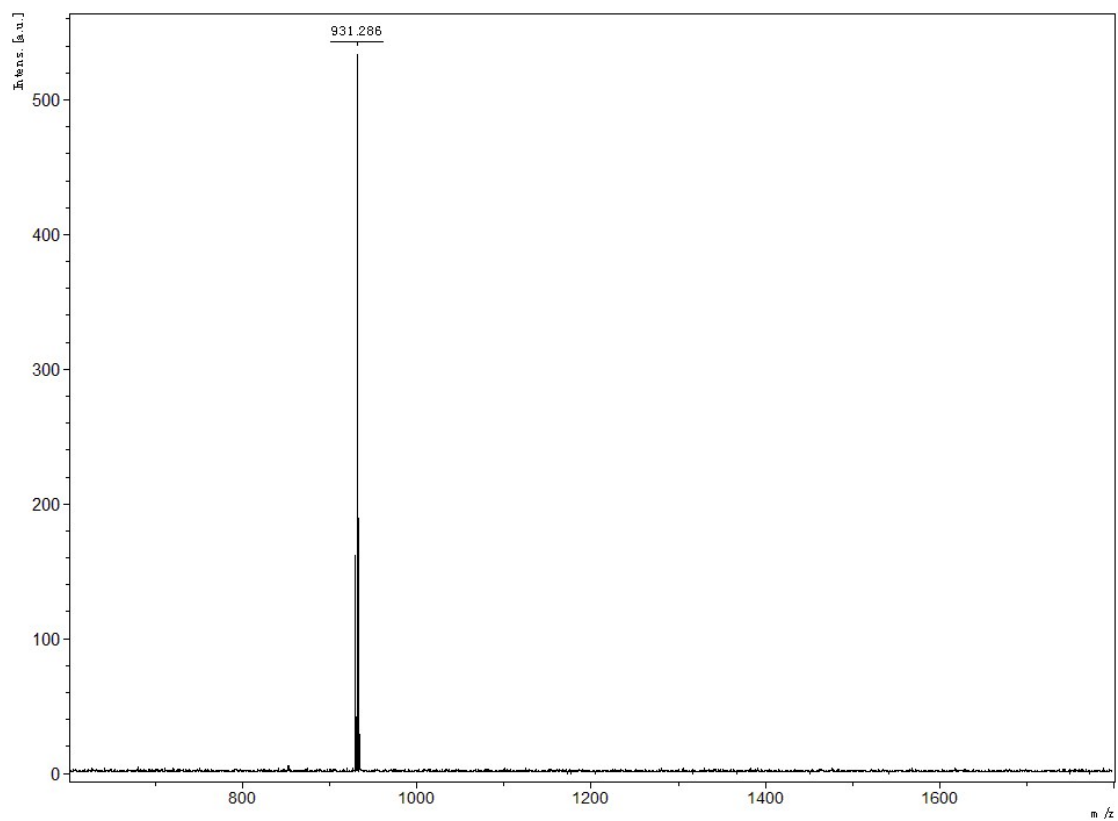

**Fig. S13.** MS spectra of M4b

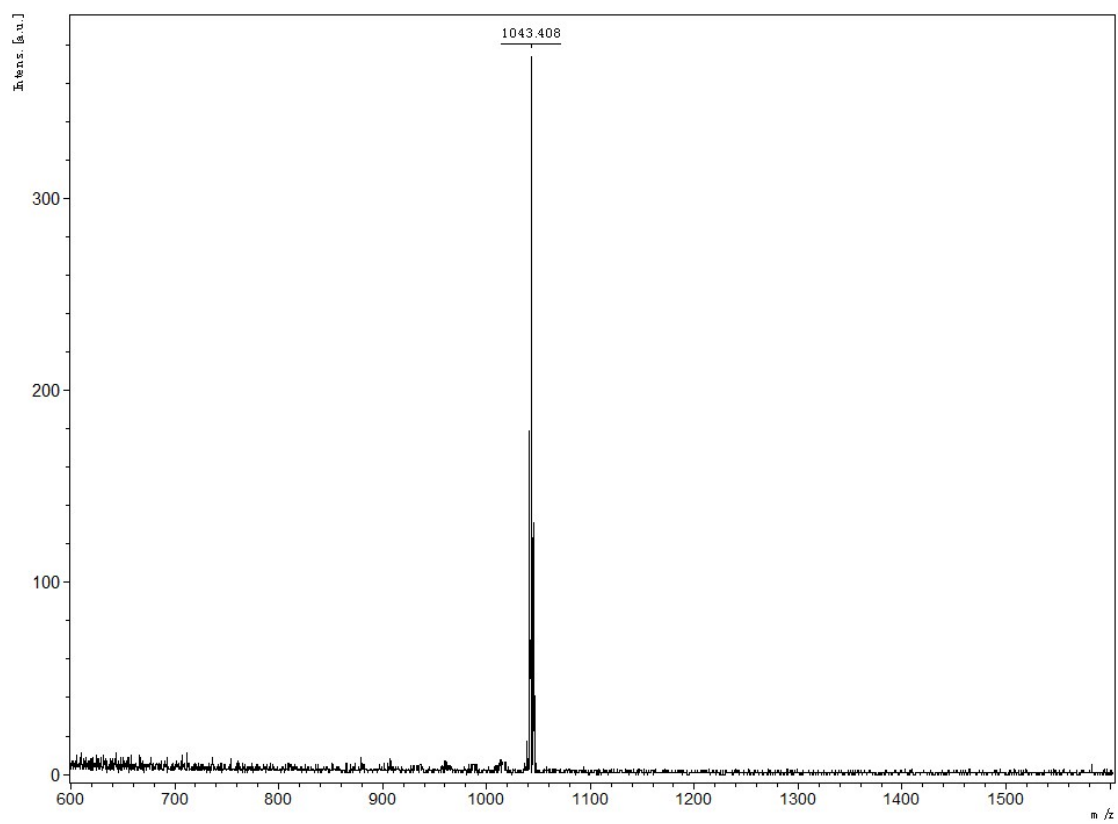

**Fig. S14.** MS spectra of M4c



GPC traces of the polymers

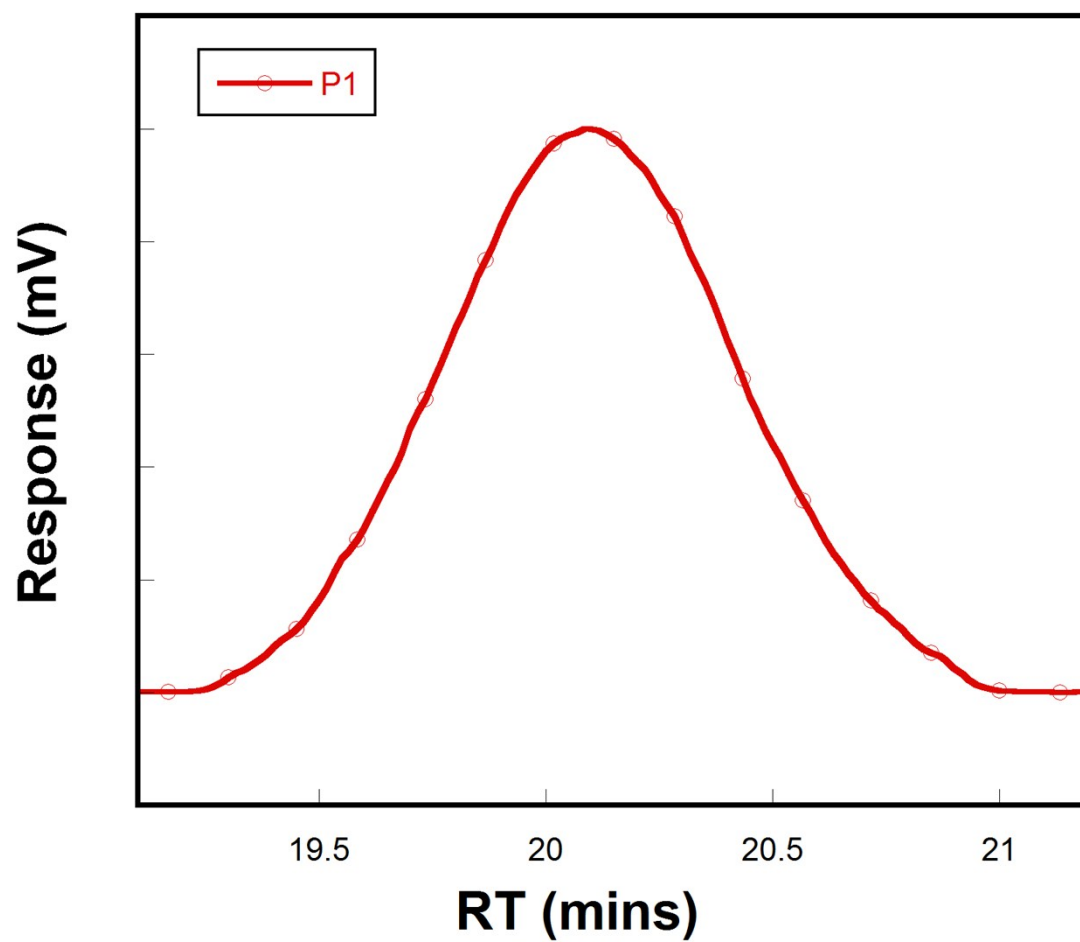

Fig. S15. GPC traces of P1

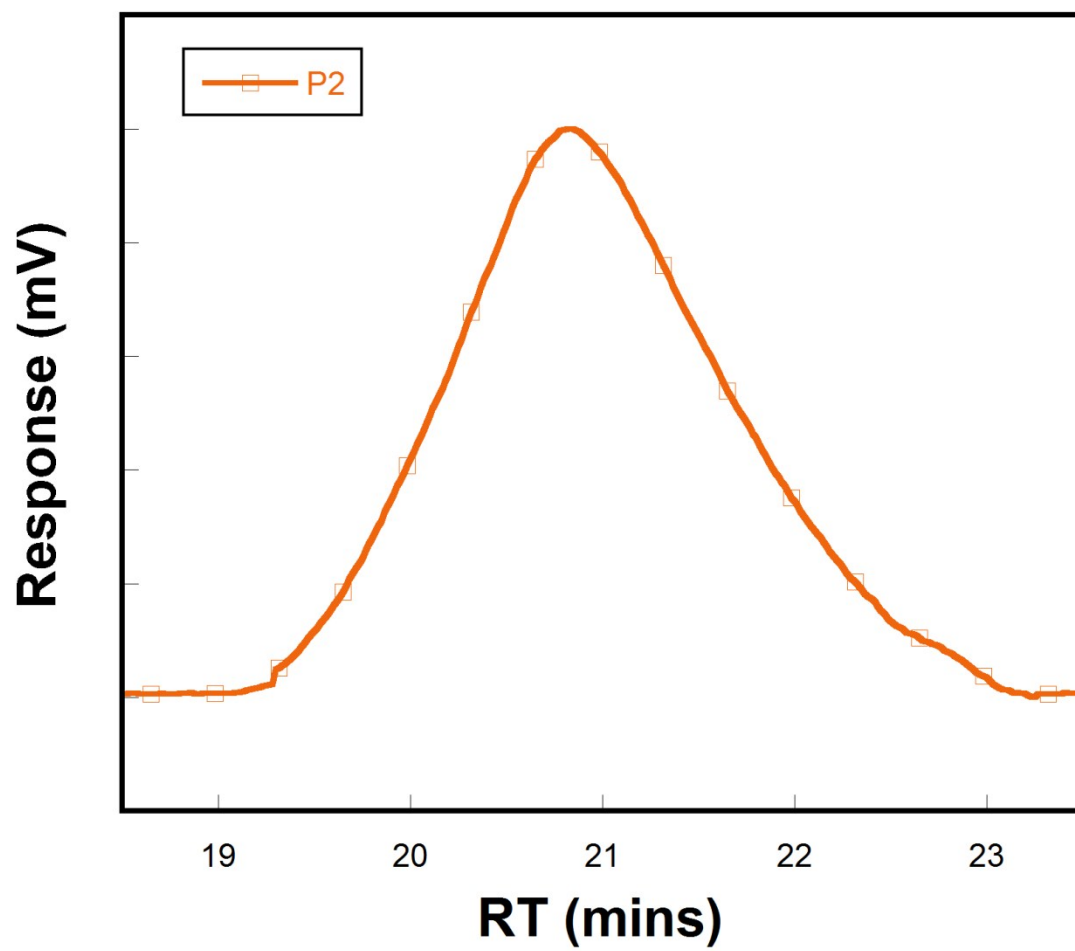

Fig. S16. GPC traces of P2

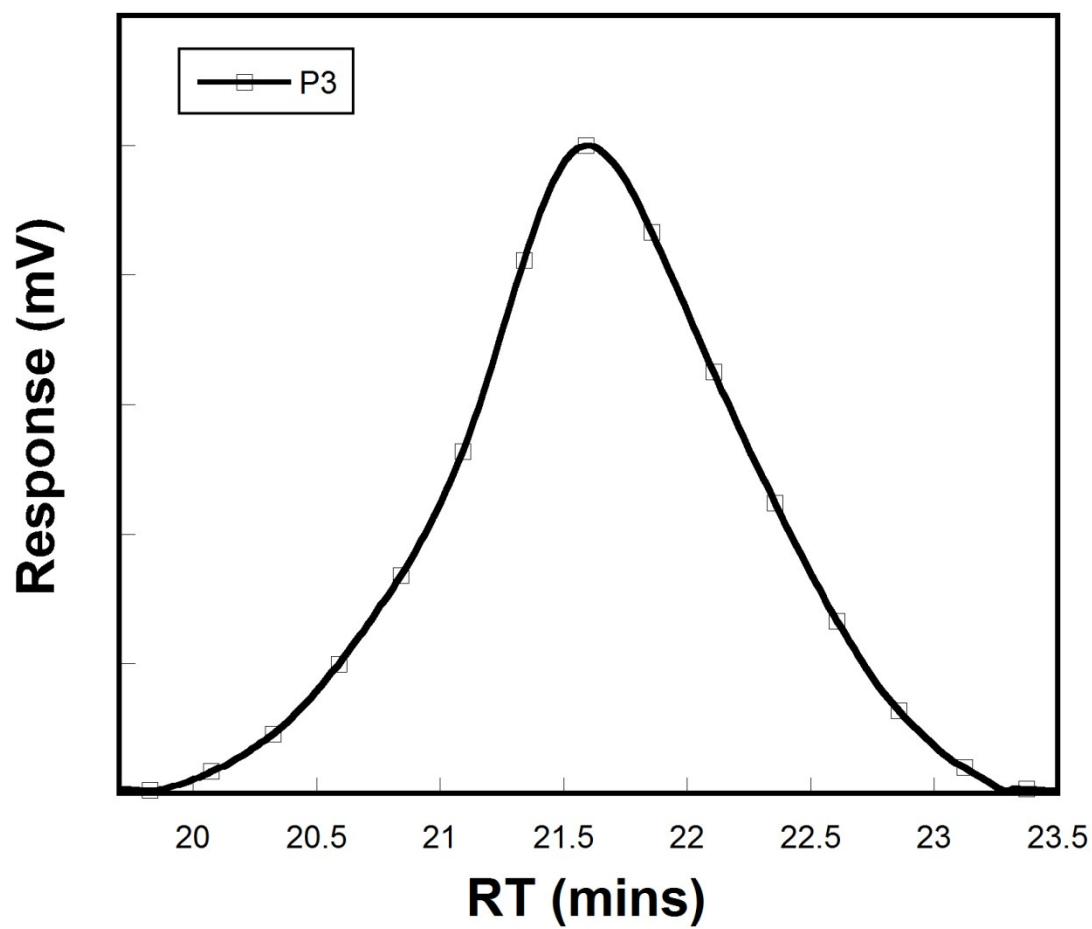

Fig. S17. GPC traces of P3
